# Supplementary material
Source: PubMed Central journal article supplement (PMC6044059)
Supplement: fj.201701016R.sd1.pdf [file fj.201701016R.sd1.pdf]

## Supplementary Tables

### Supplementary Table 1

| Primer Set        | Primer                  | Sequence (5' -3')         |
|-------------------|-------------------------|---------------------------|
| Intron VII-Exon 8 | Intron VII-forward      | ATTGAGTCATTGAAAAATTACAG   |
|                   | Exon 8-reverse          | GCCAACTATGCAGAAAAATC      |
| Exon 7            | Exon 7-forward          | GCCAGGACTTGATCAACCTAACC   |
|                   | Exon 7-reverse          | CCATTGGCATGGCCGTTCTTG     |
| Intron V          | Intron V-forward        | TGACTGGACTTTTCTATGTCTTGTG |
|                   | Exon V-reverse          | GCTACCAGCTTCTCCCATG       |
| Exon 5-Exon 6     | Exon 5-forward          | AAGACGAGAACCTGCCTCAGCA    |
|                   | Exon 6-reverse          | AGTTCATCACCTGCAACAGCC     |
| Intron I          | Intron I-forward        | CACCGTCTTAACCCGAACTC      |
|                   | Intron I-reverse        | TGACAACCCTTATCCCGATT      |
| Intron II         | Intron II-forward       | AAGCAGGAAGATGTGAACTTT     |
|                   | Intron II-reverse       | TCCAAAATACATCTGGATTGGAG   |
| Intron VI         | Intron VI-forward       | AAACTTGGTGCCCCAGGAAC      |
|                   | Intron VI-reverse       | GAGGCAGTGTCTCTGGAAAG      |
| $\beta$ - Actin   | $\beta$ - Actin-forward | ATTGGCAATGAGCGGTTC        |
|                   | $\beta$ - Actin-reverse | GGTAGTTTCGTGGATGCCACA     |
| Promoter - 7      | Promoter 7-forward      | TTCTGTGAGTTGCTGTATGTTATG  |
|                   | Promoter 7-reverse      | ATGGTCAGGGCAGTTTTTAAA     |

### Supplementary Table 2

Adaptor sequence

Transcriptional start site

**TSS I (Clone: MP1-720 #10)**

>NNNNNNNNNNNNNNNGGGCGNNTTGGGCCCTCTAGATGCATGCTCGAGCGGCCGCCAGTGTGATG  
GATATCTGCAGAATTCGCCCTT**GCCGGATCCGAACACTGCGTTTGCTGGCTTTGATGAAAAATCGG**  
CGCAGCCCTGAACTGGACAGTCTCTCCAGGACGCCGCTTTTCCGTGACAGAGGGGGTCTGCGCTAT  
CCCCAGCGACGTGTCAAGGGCAAACAGCAGCAGCAGCGGCTGCCTCTCCACCGTCTTAACCC  
GAACTCGGGCTTGTGGCGTCCCTCCCGTGGGCCGGATAGAGTGCCTAGTCCAGCTAACGGATTCA  
GCCTGGAGCGTTCTGGTGAATGCTGCTTTCCTCTTGGTGCCGCGAAGTAGAAATCGGGATAAGGG  
TTGTCATGGCCGGAGGGAGCGAAGAGAATCCAGCGTGACGACAGCATGTACGATCCCTGAATGGG

CCCGTGGGCATATTTAGTCATTCATTTTTGATCAGGAGAAAGAAGACAGCCATCATTTGAAAGAA  
GGAAGAATCCTGCTCAAAAATGAGGTGAATTAATACTTGGGCGCTCAGGAACCCTGGACAGCTAC  
ATGAGGTGTTTAAAAACTGCCCTGACCATCTTGCCAAACAAGTCTCTGCTCATGAGGCCCCACAGG  
ATGAACGAGCCGAGGCAGGACAGTGTCTGCTGCTGCGGAACAGTGACTGCTGACCTGCCAAGAG  
AGAGCTGGGGACTGCCTGCTGTCTGCCAGTACAATGAAGGAAGTGGTTTATTGGTCACCCAAGAA  
GGTGGCAGACTGGCTGCTGGAGAATGCTATGCCAGAATACTGTGAGCCTCTGGAGCATTTCACAG  
GCCAGGACTTANGGNGAATTCCAGCACACTGGCGGGCCGTTACTAGTGGNTCCNAGCTCGGTACC  
AAGCTTGGCGTAATCATGGNCATAGCTGTTTCCTGNGTGAAATTGTNATCCGCTCNCNATTCNCN  
CAANNNTACGANCCNGAAGCNTNAAGNNNNAANNCCCTGGNNNNGCCTAATGN

**TSS II (52) (Clone: MP8-R1 # 4a)**

>NNNNNNNNNNNTAGGGCGANTTGGGCCCTCTAGATGCATGCTCGAGCGGCCGCCAGTGTGATGG  
ATATCTGCAGAATTCGCCCTTCGCGGATCCGAACACTGCGTTTGCTGGCTTTGATGAAAAAGCAG  
GAAGATGGTGAACCTTATGCAATTCTGAGTTGACTCCAATCCAGATGTATTTTGGAACTAGGTAGA  
ATATGACTGGTAAAGCTTCAGCGACTGAAGGAGTGTGGACTTTTTGAATTTCAAGAACAGTAAAG  
TTGGAACACAGCAGAGGGTGTGTAATAAAATACAGATTGGAAAGAAGACTGATGAAGAAAAATA  
ACAGCATGATTCAGGCACACCATTGAGTTCTTTGGGATGCCCCGAAAGTGTCTGGTTGGGAAACAT  
GAAATAGAAGACGAGAACCTGCCTCAGCAAGCGTACCTGAGAATACTTTTAAAGGAACCTGTTGA  
TAAATGCAAAACAGTGGCTGTTGCAGGTGATGGAACTAAGGGCGAATTCCAGCACACTGGCGGCC  
GTTACTAGTGGATCCGAGCTCGGTACCAAGCTTGGCGTAATCATGGTCATAGCTGTTTCCTGTGTG  
AAATTGTTATCCGCTCACAATTCCACACAACATACGAGCCGGAAGCATAAAGTGTAAGCCTGGG  
GTGCCTAATGAGTGAGCTAACTCACATTAATTGCGTTGCGCTCACTGCCCGCTTTCCAGTCGGGAA  
ACCTGTCGTGCCAGCTGCATTAATGAATCGGCCAACGCGCGGGGAGAGGCGGTTTGCATATTGGG  
CGCTCTTCCGCTTCTCGCTCACTGACTCGCTGCGCTCGGTTCGTTTCGGCTGCGGCGAGCGGTATCA  
GCTCACTCAANGGNGGTAATACGGTTATCCACAGANCNGGGGANACGCNNNAAGANNATGTGAN  
CAAAAGCAGCAANNAGANNATAAAGCNCGTNGCTGNGTTTTCNTNGNTCNCNCCCCTGANNANC  
NTNNNAAATCNNNNCTCAGTNNANGNNGGNNNAANNCCGANNGGACTNNNN

**TSS II (Short) (Clone: MP450031210 #2)**

TTNCTGGGGTTATCCCCGGATTNTGGGGNATAACCGGTTTTCCCGCCTTTGAAGTAAGTGAAACC  
GCTTCGCCGCAGCCGAACGACCAAGGGCAACGAGTCANTAAGCGAGGAAGCGGAANAGCGCCCC  
ANTACGCAAACCGCCTTTTCCCCGNGGGGTTGGCCGATTCATTAATGCAGCTGGCACGACAGGTTT  
CCCGACTGAAAAGCGGCCAGTGAGCGCAACGCAATTANTGTGAGTTAGCTCACTCATTAGGCACC  
CCAGGCTTTTACACTTTATGCTTCCGGGCTCGTATGTTGTGGGAATTGTGAGCGGATAACANTTTC

ACACAGGAAACAGCTATGACCATGATTACGCCAAGCTTGGTACCGAGCTCGGATCCACTAGTAAC  
GGCCGCCAGTGTGCTGGAATTCGCCCTTCGCGGATCCGAACACTGCGTTTGCTGGCTTTGATGAAA  
AAAAAGCAGGAAGATGGTGAAC TTTATGCAGTTCTGAGTTGACTCCAATCCAGATGTATTTTGG AAC  
TAGGTAGAATATGACTGAAGGAAGAATCCTGCTCAAAAATGAGGTGAATTAATACTTGGGCGCTC  
AGGAACCCTGGACAGCTACATGAGGTGTTTAAAAACTGCCCTGACCATCTTGCCAAACAAGTCTCT  
GCTCATGAGGCCCCACAGGATGAACGAGCCGAGGCAGGACAGTGTCTGCTGCTGCTGCCAGTACAATGAAGGAAGTGG  
ACTGCTGACCTGCCAAGAGAGAGCTGGGGACTGCCTGCTGTCTGCCAGTACAATGAAGGAAGTGG  
TTTATTGGTCACCCAAGAAGGTGGCAGACTGGCTGCTGGAGAATGCTATGCCAGAATACTGTGAG  
CCTCTGGAGCATTTCACAGGCCAGGACTTAAGGGCGAATTCTGCAGATATCCATCACACTGGCGG  
CCGCTCGAGCATGCATCTAGAGGGCCCAATTCGCCCTATAGTGAGTCGTATTCANTNNNNNNNNN  
NNNNNCNNNNNNNNNNNT

**TSS VI (Clone: 450-3-3-9 # 3)**

>ANNCCAGCAANNNGGCCTTTTNCGNTNCNGNCCTTTGCTGNNTTTGCTNNNCATGTTCTTNNNGN  
GTNTNCCCNGNTCTGNNGATAACCNTATTACCNCTTTGAGTGAGCTGATNCGCTCGCCGCAGCCG  
AACGACCGAGCGCAGCGAGTCAGTGAGCGAGGAAGCGGAAGAGCGCCAATACGCAAACCGCCT  
CTCCCCGCGCGTTGGCCGATTCATTAATGCAGCTGGCACGACAGGTTTCCCGACTGGAAAGCGGG  
CAGTGAGCGCAACGCAATTAATGTGAGTTAGCTCACTCATTAGGCACCCCCAGGCTTTACACTTTA  
TGCTTCCGGCTCGTATGTTGTGTGGAATTGTGAGCGGATAACAATTTACACAGGAAACAGCTATG  
ACCATGATTACGCCAAGCTTGGTACCGAGCTCGGATCCACTAGTAACGGCCGCCAGTGTGCTGGA  
ATTCGCCCTTCGCGGATCCGAACACTGCGTTTGCTGGCTTTGATGAAATTCCGCCCGCGCCAGGGC  
TGGCTGCGCGCACCTGAGCGCGAGGAGCCGCGCGCAA ACTTGGTGCCCCAGGAACTTTCCAGGA  
GACTGCTCCGGGGACGAGAGACCAAGGAAGAATCCTGCTCAAAAATGAGGTGAATTAATACT  
TGGGCGCTCAGGAACCCTGGACAGCTACATGAGGTGTTTAAAAACTGCCCTGACCATCTTGCCAA  
ACAAGTCTCTGCTCATGAGGCCCCACAGGATGAACGAGCCGAGGCAGGACAGTGTCTGCTGCTGT  
CGGAACAGTGACTGCTGACCTGCCAAGAGAGAGCTGGGGACTGCCTGCTGTCTGCCAGTACAATG  
AAGGAAGTGGTTTATTGGTCACCCAAGAAGGTGGCAGACTGGCTGCTGGAGAATGCTATGCCAGA  
ATACTGTGAGCCTCTGGAGCATTTCACAGGCCAGGACTTAAGGGCGAATTCTGCAGATATCCATCA  
CACTGGCGGCCGCTCGAGCATGCATCTAGAGGGCCCAATC NNNNNNNNNNNNNNNNNNNNNN

**TSS 7 (Clone: MP8-300 #5)**

>NNNNNNNNNNNANNNGGCGATTGGGCCCTCTAGATGCATGCTCGAGCGGCCGCCAGTGTGATGG  
ATATCTGCAGAATTCGCCCTTCGCGGATCCGAACACTGCGTTTGCTGGCTTTGATGAACTTGCCAA  
ACAAGTCTCTGCTCATGAGGCCCCACAGGATGAACGAGCCGAGGCAGGACAGTGTCTGCTGCTGT

CGGAACAGTGACTGCTGACCTGCCAAGAGAGAGCTGGGGACTGCCTGCTGTCTGCCAGTACAATG  
AAGGAAGTGGTTTATTGGTCACCCAAGAAGGTGGCTGACTGGCTGCTGGAGAATGCTATGCCAGA  
ATACTGTGAGCCTCTGGAGCATTTCACAGGCCAGGACTTAAGGGCGAATTCCAGCACACTGGCGG  
CCGTTACTAGTGGATCCGAGCTCGGTACCAAGCTTGGCGTAATCATGGTCATAGCTGTTTCCTGTG  
TGAAATTGTTATCCGCTCACAATTCCACACAACATACGAGCCGGAAGCATAAAGTGTAAGCCTG  
GGGTGCCTAATGAGTGAGCTAACTCACATTAATTGCGTTGCGCTCACTGCCCGCTTTCAGTCGGG  
AAACCTGTTCGTGCCAGCTGCATTAATGAATCGGCCAACGCGCGGGGAGAGGGCGGTTTTCGTATTG  
GGCGCTCTTCCGCTTCCCTCGCTCACTGACTCGCTGCGCTCGGTTCGTTTCGGCTGCGGCGAGCGGTAT  
CAGCTCACTCAAAGGCGGTAATACGGTTATCCACAGAATCNGGGATNACGCNNNAGANATGTGAG  
CAAANNCAGCAAAGGCCNGNAACCGTAAAAAGCCGCGTTGCTGGCGTTTTNCATAGGNTCCGCCC  
CCNGACNANCATCACAAAATCGACGCTCAGTCNNAGNNGGNGAAANCCGNCNNNNCTNNNANATN  
CNGNGTTCCCCNGGNNCTCCNNNNNGNGNNNNNCNNTNCGACCNNN

### Supplementary Table 3

Promoter up-stream of TSS 7 (832 bp)

TTCTGTGAGTTGCTGTATGTTATGTACATTTTTAAACATTCTTCACGAGGTAGAGTAAGCAAATAT  
ATTTTATTCTTTTAAATTATCTCAGGAAGCATGTAAGGACAAAGAGAATACCTGGTCTCTTGACCA  
GGTTGAAAAGTGTCCAAAGCACTGTCAAGTTGCTTCTTAGAAAATAGACCATTGGAAATTATTATT  
ATTTTTTTTTTTGAGAAGGAATCTCGCTCTGTGCGCCAGGCTGGAGTACAGTGGCTGATCTCGGCT  
CACTGCAAGCTCCGCCTCCCGGGTTCACACCATTCTCCTGCCTCAGCCTGGGCAGGAGTAGCTGGG  
ACTACAGGCGCCCGCCACCACACCCGGCTAATTTTTTGTATTTTAGTAGAGACAGGGTTTCACCG  
TGTTAGCCAGGATGCTCTCTATCTCCTGACCTCGTGATCCGCCCCGCTCGTTCTCCCAAAGCGCTG  
GGATTACAGGCGTGAGCCACCACGCCCCGGCTGACCGTTGGAAATTCTATAAAATATGTCTCCTTTG  
ACAACATCCATTTTCAGATCCAATTCAATGTGTGTCGAAAAGACTAATAACCAGGAAATCAGTA  
GTCCCTGAAACGAATACATGTTTGAAAATTAAGTTTACCAATAACTGGTTTTCTACTTTCCTTA  
TGTATATAAGGCTTTGCGTTTTGAGAGGGGTAATTTGGAAGTACAGCATCTTGATATTTTCTCTTGCT  
TTCACAGAAGGAAGAATCCTGCTCAAAAATGAGGTGAATTAATACTTGGGCGCTCAGGAACCCTG  
GACAGCTACATGAGGTGTTTAAAAACTGCCCTGACCAT

### Supplementary Table 4

mRNA Transcript - TSS IIb

AAAGCAGGAAGATGGTGAACCTTATGCAATTCTGAGTTGACTCCAATCCAGATGTATTTTGGAAC  
AGGTAGAATATGACTGGTAAAGCTTCAGCGACTGAAGGAGTGTGGACTTTTTGAATTTCAAGAAC

AGTAAAGTTGGAACACAGCAGAGGGTGTGTAATAAAAATACAGATTGGAAAGAAGACTGATGAAG  
AAAAATAACAGCATGATTCAGGCACACCATTGAGTTCTTTGGGATGCCCGAAAGTGTCTGGTTGG  
GAAACATGAAATAGAAGACGAGAACCTGCCTCAGCAAGCGTACCTGAGAATACTTTTAAAGGAAC  
CTGTTGATAAATGCAAAACAGTGGCTGTTGCAGGTGATGGAAGTGTACTGGAACAATGGGAGAAG  
CTGGTAGCTTATAGGAAGCCAAGATGACCAGAATGTTTTTAAATAATCCAAGGAAGAATCCTGCT  
CAAAAATGAGGTGAATTAATACTTGGGCGCTCAGGAACCCTGGACAGCTACATGAGGTGTTTAAA  
AACTGCCCTGACCATCTTGCCAAACAAGTCTCTGCTCATGAGGCCCCACAGGATGAACGAGCCGA  
GGCAGGACAGTGTCTGCCCTGTCGGAACAGTGACTGCTGACCTGCCAAGAGAGAGCTGGGGACT  
GCCTGCTGTCTGCCAGTACAATGAAGGAAGTGGTTTATTGGTCACCCAAGAAGGTGGCAGACTGG  
CTGCTGGAGAATGCTATGCCAGAATACTGTGAGCCTCTGGAGCATTTCACAGGCCAGGACTTGATC  
AACCTAACCCAAGAGGATTTCAAAAACCCCCCTGTGCCGAGTCTCCTCTGACAATGGGCAGCG  
GCTCCTGGACATGATAGAAACCCTGAAAATGGAGCACCATTTGGAAGCACACAAGAACGGCCATG  
CCAATGGGCACCTCAACATTGGCGTAGACATCCCCACCCCGACGGCAGCTTCAGCATCAAGATT  
AAACCCAACGGGATGCCAAATGGGTATAGGAAAGAGATGATAAAGATCCCCATGCCAGAACTGG  
AGCGCTCTCAGTACCCCATGGAGTGGGGCAAGACTTTTCTGGCCTTTCTTTATGCACTTTCCTGTTT  
CGTTCTCACCACAGTGATGATCTCGGTCGTCCACGAACGAGTACCTCCTAAGGAGGTGCAGCCTCC  
ACTACCGGACACATTTTTTGACCATTTTAACCGGGTGCAGTGGGCCTTTTCTATTTGTGAAATTAAT  
GGCATGATCCTTGTAGGACTCTGGTTAATTCAGTGGCTGCTCTTAAAATACAAGTCTATTATTAGC  
AGAAGATTTTTCTGCATAGTTGGCACGCTGTACCTGTATCGGTGTATTACAATGTATGTA ACTACA  
CTCCCAGTACCTGGTATGCATTTCAACTGTTCTCCGAAGCTTTTCGGAGACTGGGAAGCCCAACTG  
CGAAGAATAATGAAGCTCATTGCTGGAGGTGGCTTGTCTATCACTGGCTCTCACAACATGTGTGGG  
GACTATCTGTACAGCGGCCACACGGTCATGCTAACACTTACCTACTTATTTATCAAAGAGTATTCC  
CCTCGGCGACTCTGGTGGTATCACTGGATTTGCTGGCTTCTCAGCGTAGTTGGAATCTTCTGTATTC  
TCTTAGCGCATGACCACTACACTGTGGACGTGGTGGTGGCATATTACATCACCACGAGACTCTTCT  
GGTGGTATCACACTATGGCCAATCAGCAAGTGCTAAAGGAAGCTTCCCAGATGAACCTCCTGGCC  
AGGGTGTGGTGGTACAGGCCATTTCAGTACTTTGAAAAGAATGTCCAAGGAATTGTACCTCGATCT  
TACCATTGGCCTTTCCCCTGGCCAGTAGTCCACCTCAGTAGGCAAGTTAAATACAGCCGGCTGGTG  
AATGACACAGACTACAAAGACGATGACGACAAGTAA

mRNA Transcript - TSS 7

CTTGCCAAACAAGTCTCTGCTCATGAGGCCCCACAGGATGAACGAGCCGAGGCAGGACAGTGTCC  
TGCCCTGTCGGAACAGTGACTGCTGACCTGCCAAGAGAGAGCTGGGGACTGCCTGCTGTCTGCCA  
GTACAATGAAGGAAGTGGTTTATTGGTCACCCAAGAAGGTGGCTGACTGGCTGCTGGAGAATGCT  
ATGCCAGAATACTGTGAGCCTCTGGAGCATTTCACAGGCCAGGACTTGATCAACCTAACCCAAGA

GGATTTCAAAAACCCCCCTTGTGCCGAGTCTCCTCTGACAATGGGCAGCGGCTCCTGGACATGAT  
AGAAACCCTGAAAATGGAGCACCATTTGGAAGCACACAAGAACGGCCATGCCAATGGGCACCTC  
AACATTGGCGTAGACATCCCCACCCCGACGGCAGCTTCAGCATCAAGATTAACCCAACGGGAT  
GCCAAATGGGTATAGGAAAGAGATGATAAAGATCCCCATGCCAGAACTGGAGCGCTCTCAGTACC  
CCATGGAGTGGGGCAAGACTTTTTCTGGCCTTTCTTTATGCACTTTCCTGTTTCGTTCTCACCACAGT  
GATGATCTCGGTTCGTCCACGAACGAGTACCTCCTAAGGAGGTGCAGCCTCCACTACCGGACACAT  
TTTTTGACCATTTTAACCGGGTGCAGTGGGCCTTTTCTATTTGTGAAATTAATGGCATGATCCTTGT  
AGGACTCTGGTTAATTCAGTGGCTGCTCTTAAAATACAAGTCTATTATTAGCAGAAGATTTTTCTG  
CATAGTTGGCAGCTGTACCTGTATCGGTGTATTACAATGTATGTAACACTACACTCCCAGTACCTGG  
TATGCATTTCAACTGTTCTCCGAAGCTTTTCGGAGACTGGGAAGCCCAACTGCGAAGAATAATGAA  
GCTCATTGCTGGAGGTGGCTTGTCTATCACTGGCTCTCACAACATGTGTGGGGACTATCTGTACAG  
CGGCCACACGGTCATGCTAACACTTACCTACTTATTTATCAAAGAGTATTCCTCGGCGACTCTG  
GTGGTATCACTGGATTTGCTGGCTTCTCAGCGTAGTTGGAATCTTCTGTATTCTCTTAGCGCATGAC  
CACTACACTGTGGACGTGGTGGTGGCATATTACATCACCACGAGACTCTTCTGGTGGTATCACACT  
ATGGCCAATCAGCAAGTGCTAAAGGAAGCTTCCCAGATGAACCTCCTGGCCAGGGTGTGGTGGTA  
CAGGCCATTTAGTACTTTGAAAAGAATGTCCAAGGAATTGTACCTCGATCTTACCATTGGCCTTT  
CCCCTGGCCAGTAGTCCACCTCAGTAGGCAAGTTAAATACAGCCGGCTGGTGAATGACACAGACT  
ACAAAGACGATGACGACAAGTAA

## Supplementary figure legends

**Supplementary Figure S1: mRNA expression of *SGMS1*.** Abundance of mRNA was evaluated by qRT-PCR with two sets of primers spanning Exon 5-Exon 6 or within Exon 7 (primer sequences in supplementary Table 1). All results represent three independent experiments. Asterisks indicate significance; \*\*\*  $p < 0.0005$ ; \*\*  $p < 0.005$ ; \*  $p < 0.05$ .

**Figure S2: Efficiency of translation of SMS1 from Transcript IIb or Transcript 7 in HeLa cells.** HeLa cells were transfected with pCDNA3.1 to over-express either transcripts from TSS IIb or TSS 7. Cells were collected after 10h and 26h and processed for western blotting and mRNA measurements. **(S2A)** Quantification of SMS1 bands in western blots (vector subtracted) for three different experiments. **(S2B)** Measurements of mRNA abundance; for cells over-expressing TSS IIb transcript, primers from FEP Intron II were used while FEP primers for Exon 7 were utilized for cells over-expressing TSS 7 transcript.

**Figure S3: Efficiency of translation of SMS1 from Transcript IIb or Transcript 7 in K562 cells.** K562 cells were transfected with pEF1 to over-express either transcript IIb or transcript 7. Cells were collected after 8h and 10h and processed for western blotting and mRNA measurements. **(S3A)** Quantification of SMS1 bands in western blots (vector subtracted) for three different experiments. **(S3B)** Measurements of mRNA abundance; for cells over-expressing TSS IIb transcript, primers from FEP Intron II were used while FEP primers for Exon 7 were utilized for cells over-expressing TSS 7 transcript.
