# Supplementary material
Source: PubMed Central journal article supplement (PMC6044059)

FIGURE S1

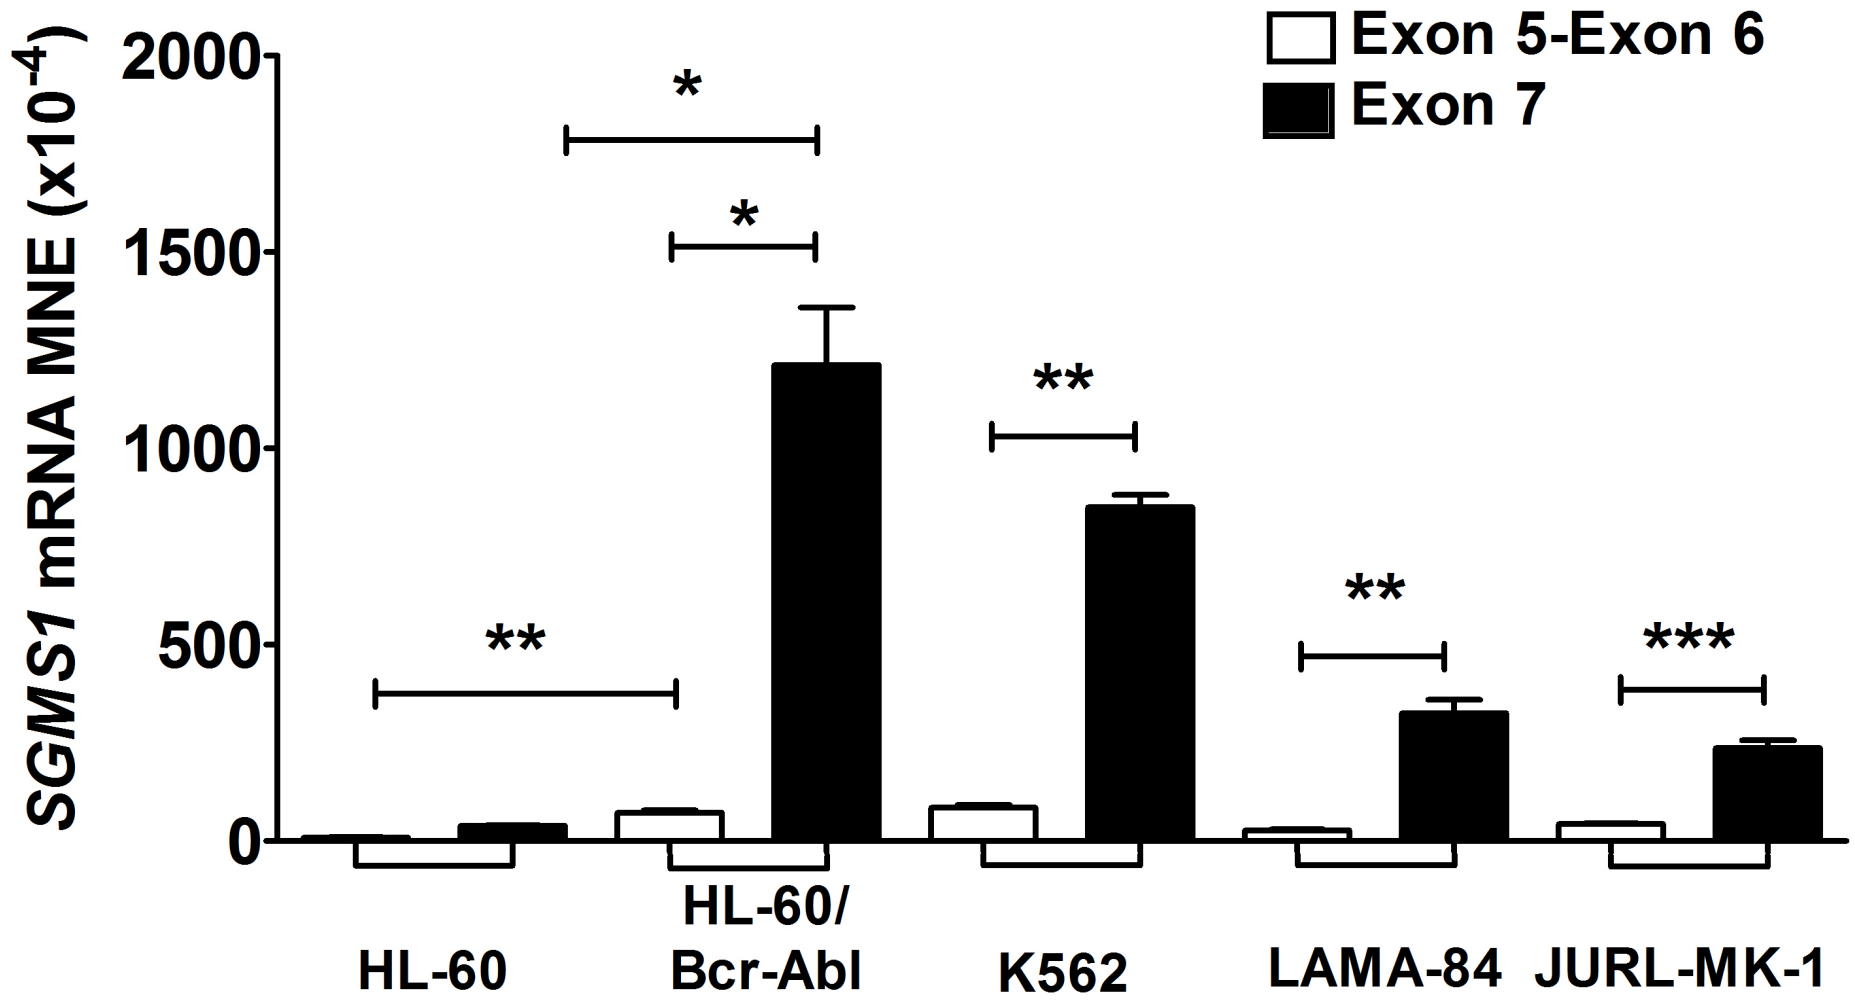

**FIGURE S2**

**S2A**

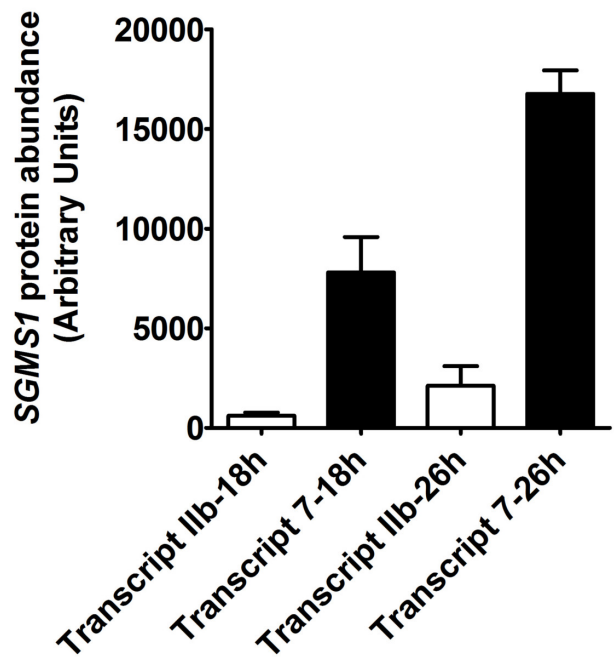

**S2B**

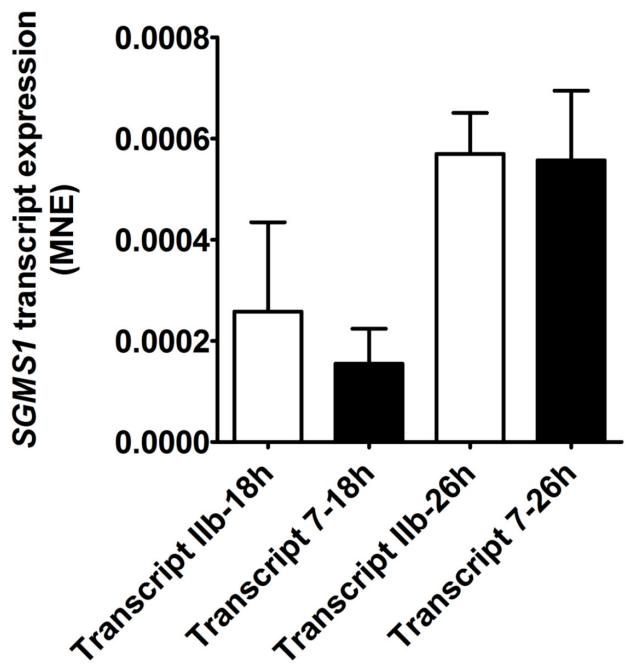

**FIGURE S3**

**S3A**

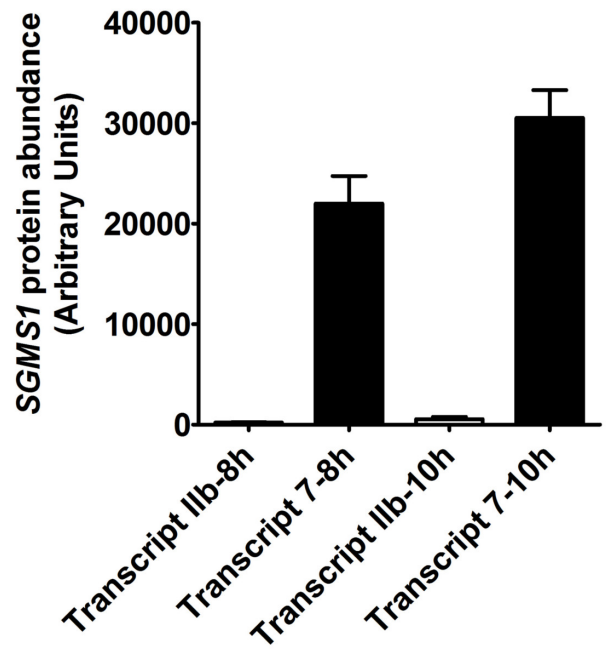

**S3B**

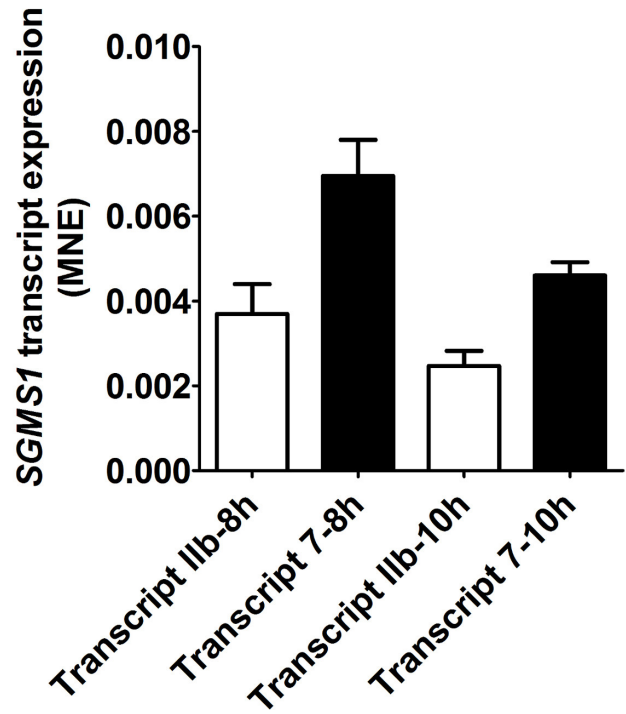

Supplement: fj.201701016R.sf1.pdf [file fj.201701016R.sf1.pdf]
